# Supplementary material for: A Case Report of Recurrent Bilateral Giant Fibroadenomas in a Young Woman with PIK3CA Mutation
Source: Research Square preprint supplement (doi:10.21203/rs.3.rs-6695035/v1), 2025-06-20
Supplement: Supplementary file 1 [file 398778f39ce9a0771f2ba5a4.docx]

**Supplemental files**


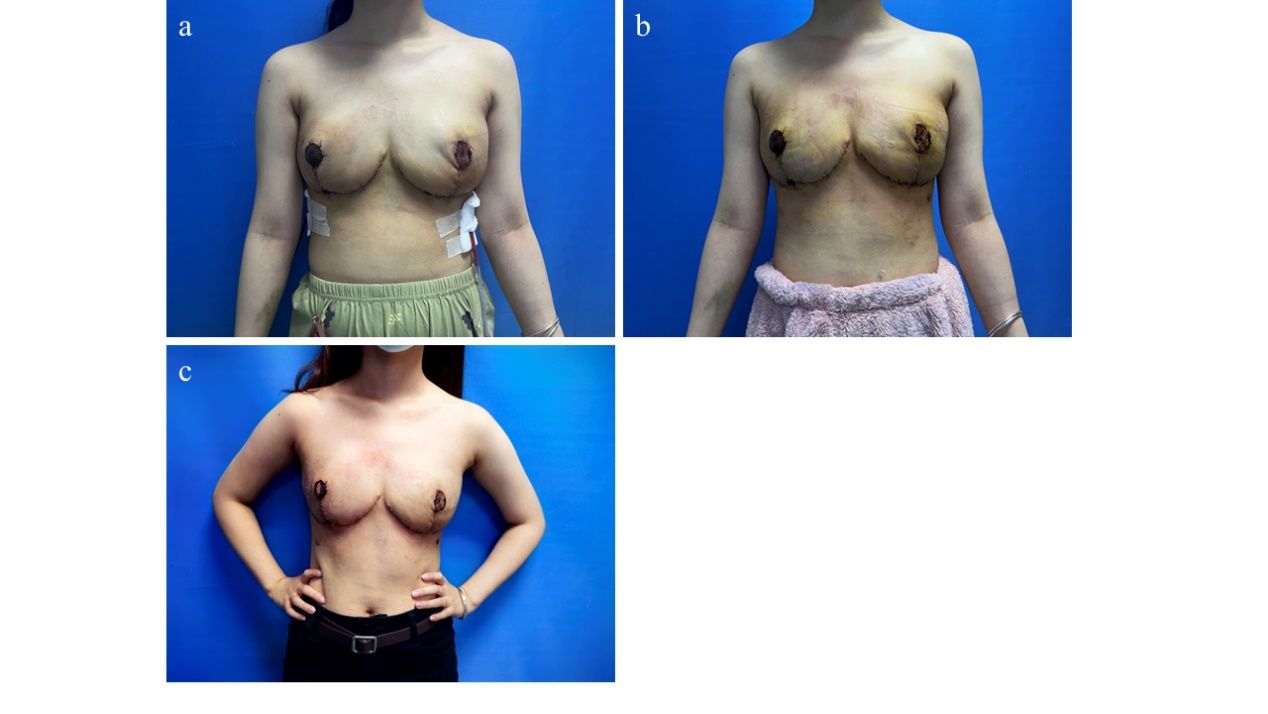


The patient showed satisfactory recovery postoperatively, with good symmetry of the breasts following surgical treatment. (a) February 3, 2024, 4 days postoperative. (b) February 7, 2024, 8 days postoperative. (c) February 15, 2024, 16 days postoperative.
